# Supplementary material for: Kinetics and mechanism of the reactions of [FeCl4]– with PhS– or PhSH in MeCN, and the role of cations containing N–H groups
Source: Royal Society of Chemistry journal article supplement (doi:10.1039/b503501e), 2005-01-01
Supplement: b503501e.pdf [file b503501e.pdf]

### SUPPLEMENTARY DATA

**TABLE S1**

Kinetic Data for the Reactions of  $[\text{FeCl}_4]^-$  ( $0.05 \text{ mmol dm}^{-3}$ ) with  $\text{PhS}^-$  or  $\text{PhSH}$  in MeCN at  
25.0 °C  
Measured at  $\lambda = 500 \text{ nm}$

| $[\text{PhS}^-] / \text{mmol dm}^{-3}$<br>$/ \text{s}^{-1}$ | $[\text{PhSH}] / \text{mmol dm}^{-3}$ | $k_{\text{obs}}^{\text{f}} / \text{s}^{-1}$ | $k_{\text{obs}}^{\text{s}}$ |
|-------------------------------------------------------------|---------------------------------------|---------------------------------------------|-----------------------------|
| 0.1 <sup>a</sup>                                            |                                       | 4.5                                         | 0.42                        |
| 0.15 <sup>a</sup>                                           |                                       | 6.2                                         | 0.80                        |
| 0.25 <sup>a</sup>                                           |                                       | 7.6                                         | 0.84                        |
| 0.4 <sup>a</sup>                                            |                                       | 11                                          | 1.18                        |
| 0.5 <sup>a</sup>                                            |                                       | 11.6                                        | 1.38                        |
| 1.0                                                         |                                       | 12.5                                        | 3.0                         |
|                                                             |                                       | 13                                          | 3.1                         |
| 1.0 <sup>b</sup>                                            |                                       | 14                                          | 3.0                         |
| 1.0 <sup>c</sup>                                            |                                       | 14.2                                        | 2.9                         |
| 2.5                                                         |                                       | 23                                          | 6.2                         |
|                                                             |                                       | 25                                          | 6.0                         |
| 5.0                                                         |                                       | 29                                          | 7.5                         |
|                                                             |                                       | 31                                          | 8.1                         |
| 7.5                                                         |                                       | 31                                          | 10.2                        |
| 10.0                                                        |                                       | 33                                          | 11.0                        |
| 20.0                                                        |                                       | 40                                          | 11.5                        |
|                                                             |                                       | 39                                          | 11.7                        |
|                                                             | 1.0                                   | 3.5                                         | 0.06                        |
|                                                             | 3.0                                   | 4.0                                         | 0.11                        |
|                                                             | 5.0                                   | 4.0                                         | 0.17                        |
|                                                             | 7.5                                   | 3.5                                         | 0.20                        |
|                                                             | 10.0                                  | 3.5                                         | 0.23                        |
|                                                             | 20.0                                  | 4.0                                         | 0.25                        |

*footnotes:*

<sup>a</sup>  $[\text{FeCl}_4^-] = 0.02 \text{ mmol dm}^{-3}$

<sup>b</sup>  $[\text{FeCl}_4^-] = 0.10 \text{ mmol dm}^{-3}$

<sup>c</sup>  $[\text{FeCl}_4^-] = 0.025 \text{ mmol dm}^{-3}$

**TABLE S2**

Kinetic Data for the Reactions of  $[\text{FeCl}_4]^-$  ( $0.05 \text{ mmol dm}^{-3}$ ) with  $\text{PhS}^-$  in the Presence of Cations in MeCN at  $25.0 \text{ }^\circ\text{C}$ . Measured at  $\lambda = 500 \text{ nm}$

| Cation<br>$k_{\text{obs}}^{\text{s}}$ | [cation]                                      | [ $\text{PhS}^-$ ]      | $k_{\text{obs}}^{\text{f}}$ |                   |
|---------------------------------------|-----------------------------------------------|-------------------------|-----------------------------|-------------------|
|                                       | / $\text{mmol dm}^{-3}$                       | / $\text{mmol dm}^{-3}$ | / $\text{s}^{-1}$           | / $\text{s}^{-1}$ |
| $[\text{NEt}_4]^+$ (Cl)               | 0.0                                           | 10.0 <sup>a</sup>       | 4.0                         | 0.22              |
|                                       | 1.0                                           |                         | 7.3                         | 0.28              |
|                                       | 2.5                                           |                         | 9.0                         | 0.36              |
|                                       | 5.0                                           |                         | 8.5                         | 0.50              |
|                                       | 10.0                                          |                         | 11.5                        | 0.90              |
|                                       | 20.0                                          |                         | 12.5                        | 1.15              |
|                                       | $[\text{NEt}_4]^+$ (BPh <sub>4</sub> )<br>1.8 | 0.0                     | 1.0                         | 11.2              |
| 1.0                                   |                                               |                         | 11.4                        | 1.7               |
| 1.5                                   |                                               |                         | 12.0                        | 1.6               |
| 2.0                                   |                                               |                         | 11.7                        | 1.4               |
| 3.5                                   |                                               |                         | 12.4                        | 1.4               |
| 6.0                                   |                                               |                         | 13.0                        | 1.6               |
| 11.0                                  |                                               |                         | 12.6                        | 1.5               |
| 0.0                                   |                                               | 10.0 <sup>a</sup>       | 3.8                         | 0.25              |
| 1.0                                   |                                               |                         | 3.2                         | 0.35              |
| 2.5                                   |                                               |                         | 3.7                         | 0.35              |
| 5.0                                   |                                               |                         | 4.6                         | 0.39              |
| 7.5                                   |                                               |                         | 5.0                         | 0.31              |
| 10.0                                  |                                               |                         | 4.7                         | 0.38              |
| $[\text{NHEt}_3]^+$                   | 0.0                                           | 10.0                    | 32                          | 9.7               |
|                                       |                                               |                         | 33                          | 9.8               |
|                                       | 1.0                                           |                         | 33                          | 9.6               |
|                                       | 2.5                                           |                         | 27                          | 9.5               |
|                                       |                                               |                         | 30                          | 9.3               |
|                                       | 5.0                                           |                         | 26                          | 7.8               |
|                                       |                                               |                         | 26                          | 8.0               |
|                                       | 7.5                                           |                         | 21                          | 5.4               |
|                                       |                                               |                         | 19                          | 5.7               |
|                                       | 9.0                                           |                         | 17                          | 4.5               |
|                                       |                                               |                         | 17                          | 4.4               |
|                                       | 10.0                                          |                         | 14                          | 2.5               |
|                                       |                                               |                         | 15                          | 2.7               |
| 11.0                                  |                                               | 17                      | 2.0                         |                   |

| Cation                                          | [cation]                | [PhS <sup>-</sup> ]     | $k_{\text{obs}}^f$ |                   |
|-------------------------------------------------|-------------------------|-------------------------|--------------------|-------------------|
|                                                 | / mmol dm <sup>-3</sup> | / mmol dm <sup>-3</sup> | / s <sup>-1</sup>  | / s <sup>-1</sup> |
|                                                 | 12.5                    |                         | 16                 | 2.2               |
|                                                 |                         |                         | 20                 | 2.7               |
|                                                 |                         |                         | 18                 | 2.8               |
|                                                 | 15.0                    |                         | 23                 | 2.7               |
|                                                 |                         |                         | 22                 | 3.0               |
|                                                 | 20.0                    |                         | 25                 | 3.2               |
|                                                 |                         |                         | 23                 | 3.4               |
| [NHEt <sub>3</sub> ] <sup>+</sup>               |                         | 5.0                     |                    |                   |
|                                                 | 0.0                     |                         | 16.0               |                   |
|                                                 |                         | 8.4                     |                    |                   |
|                                                 | 2.0                     |                         | 12.1               | 6.2               |
|                                                 | 4.0                     |                         | 13.0               | 3.3               |
|                                                 | 5.0                     |                         | 15.8               | 1.6               |
|                                                 | 6.0                     |                         | 17.0               | 1.9               |
|                                                 | 7.5                     |                         | 19.3               | 2.4               |
|                                                 | 10.0                    |                         | 20.0               | 3.0               |
|                                                 | 20.0                    |                         | 23.0               | 3.5               |
|                                                 |                         | 20.0                    |                    |                   |
|                                                 | 0.0                     |                         | 46                 | 12                |
|                                                 | 2.5                     |                         | 40                 | 9.0               |
|                                                 | 7.5                     |                         | 37                 | 8.0               |
|                                                 | 15.0                    |                         | 30.5               | 5.2               |
|                                                 | 17.5                    |                         | 20.4               | 2.6               |
|                                                 | 20.0                    |                         | 15.2               | 2.0               |
|                                                 | 22.5                    |                         | 17.0               | 2.7               |
|                                                 | 25.0                    |                         | 16.8               | 2.5               |
|                                                 | 30.0                    |                         | 17.0               | 3.6               |
| [NH <sub>2</sub> Et <sub>2</sub> ] <sup>+</sup> |                         | 10.0                    |                    |                   |
|                                                 | 0.0                     |                         | 36.1               | 10.6              |
|                                                 | 1.0                     |                         | 35.0               | 10.4              |
|                                                 | 2.5                     |                         | 34.7               | 9.7               |
|                                                 | 5.0                     |                         | 29.0               | 9.1               |
|                                                 | 7.5                     |                         | 25.0               | 6.8               |
|                                                 | 9.0                     |                         | 18.5               | 4.4               |
|                                                 | 10.0                    |                         | 15.3               | 3.7               |
|                                                 | 11.0                    |                         | 15.5               | 3.5               |
|                                                 | 12.5                    |                         | 15.9               | 3.9               |
|                                                 | 15.0                    |                         | 20.8               | 4.3               |
|                                                 | 20.0                    |                         | 23.5               | 4.5               |
|                                                 | 30.0                    |                         | 25.9               | 4.7               |

|                     |      |      |    |      |
|---------------------|------|------|----|------|
| [lutH] <sup>+</sup> | 0.0  | 10.0 | 35 | 9.0  |
|                     |      |      | 33 | 10.0 |
|                     | 1.0  |      | 30 | 10.2 |
|                     |      |      | 27 | 10.8 |
|                     | 2.5  |      | 32 | 9.3  |
|                     |      |      | 28 | 9.5  |
|                     | 5.0  |      | 24 | 8.4  |
|                     |      |      | 24 | 8.8  |
|                     | 7.5  |      | 19 | 5.0  |
|                     |      |      | 17 | 2.1  |
|                     | 11.0 |      | 11 | 0.5  |
|                     |      |      | 11 | 0.6  |
|                     | 12.5 |      | 13 | 0.6  |
|                     |      |      | 13 | 0.5  |
|                     | 15.0 |      | 15 | 0.5  |
|                     |      |      | 15 | 0.55 |
|                     | 20.0 |      | 15 | 0.5  |
|                     |      |      | 15 | 0.5  |

*footnotes:*

<sup>a</sup> nucleophile is PhSH
